# Supplementary material for: Reaction of stannylene phosphorus Lewis pairs with dichlorides of germanium, tin and lead – the formation of base stabilized stannyl stannylenes/germylenes and redox reaction with PbCl2
Source: Royal Society of Chemistry journal article supplement (doi:10.1039/c6dt00916f), 2016-01-01

## Supporting Information:

Reaction of Stannylene Phosphorus Lewis Pairs with Dichlorides of Germanium, Tin and Lead –  
Formation of Base stabilized Stannyl Stannylenes/Germlylenes and Redox Reaction with PbCl<sub>2</sub>

Kilian M. Krebs, Jakob J. Maudrich, Lars Wesemann\*

Institut für Anorganische Chemie, Universität Tübingen, Auf der Morgenstelle 18, D-72076 Tübingen

### Table of contents

|          |                                                                                                                                                |          |
|----------|------------------------------------------------------------------------------------------------------------------------------------------------|----------|
| <b>1</b> | <b>CRYSTALLOGRAPHIC DETAILS</b> .....                                                                                                          | <b>2</b> |
| 1.1      | CRYSTAL STRUCTURES OF COMPOUNDS 1-5 .....                                                                                                      | 2        |
| 1.2      | CRYSTAL STRUCTURE REFINEMENT TABLES .....                                                                                                      | 3        |
| <b>2</b> | <b>ADDITIONAL NMR DATA</b> .....                                                                                                               | <b>4</b> |
| 2.1      | <sup>31</sup> P- <sup>31</sup> P EXSY NMR SPECTRUM FOR COMPOUND <b>4</b> (TOL-D8) .....                                                        | 4        |
| 2.2      | DT <sup>31</sup> P NMR SPECTRA FOR COMPOUND <b>4</b> (TOL-D8).....                                                                             | 4        |
| 2.3      | <sup>1</sup> H, <sup>13</sup> C, <sup>119</sup> SN AND <sup>31</sup> P NMR SPECTRA FOR COMPOUND <b>1</b> (C <sub>6</sub> D <sub>6</sub> )..... | 5        |
| 2.4      | <sup>1</sup> H, <sup>13</sup> C, <sup>119</sup> SN AND <sup>31</sup> P NMR SPECTRA FOR COMPOUND <b>2</b> (C <sub>6</sub> D <sub>6</sub> )..... | 6        |
| 2.5      | <sup>1</sup> H, <sup>13</sup> C, <sup>119</sup> SN AND <sup>31</sup> P NMR SPECTRA FOR COMPOUND <b>3</b> (C <sub>6</sub> D <sub>6</sub> )..... | 7        |
| 2.6      | <sup>1</sup> H, <sup>13</sup> C, <sup>119</sup> SN AND <sup>31</sup> P NMR SPECTRA FOR COMPOUND <b>4</b> (C <sub>6</sub> D <sub>6</sub> )..... | 8        |
| 2.7      | <sup>1</sup> H, <sup>13</sup> C, <sup>119</sup> SN AND <sup>31</sup> P NMR SPECTRA FOR COMPOUND <b>5</b> (C <sub>6</sub> D <sub>6</sub> )..... | 9        |
| 2.8      | EXAMPLARY DETERMINATION OF THE COUPLING PATTERN IN THE <sup>119</sup> SN NMR SPECTRA (COMPOUND <b>2</b> ):.....                                | 10       |

# 1 Crystallographic Details

## 1.1 Crystal structures of compounds 1-4

Hydrogen atoms and isopropyl moieties are omitted for clarity.

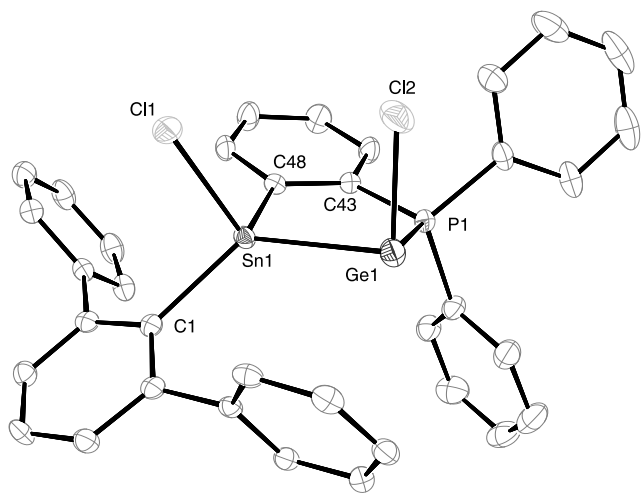

1

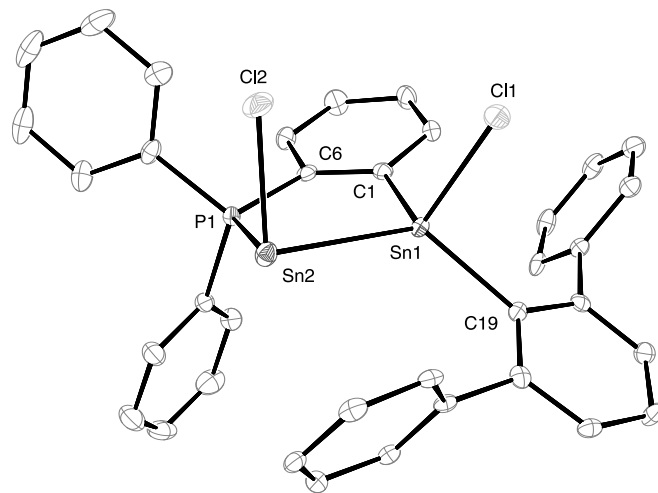

2

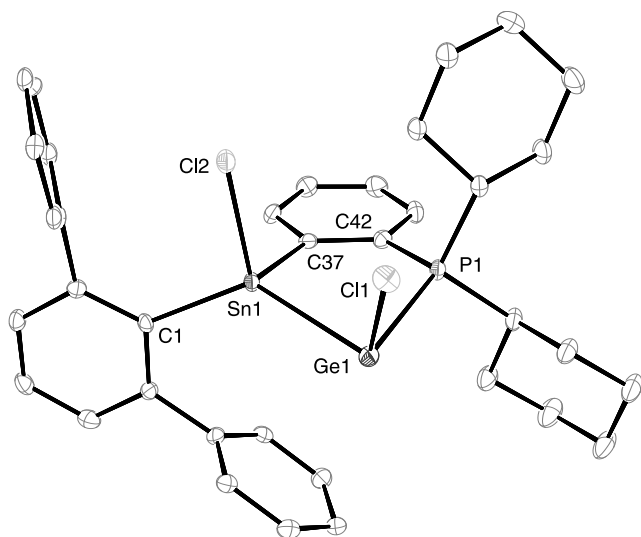

3

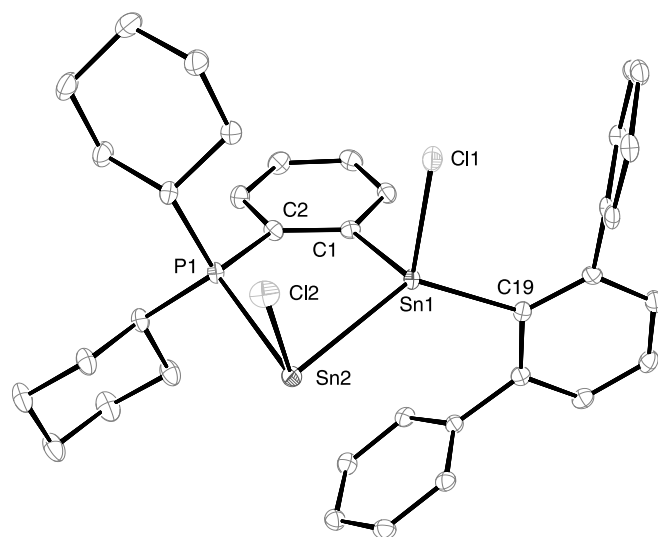

4

## 1.2 Crystal Structure Refinement Tables

**Table S1.** Crystal structure refinement table of compounds **1 - 5**.

|                                              | <b>1</b> × 2 eq toluene                               | <b>2</b> × 2 eq toluene                                          | <b>3</b>                                              | <b>4</b>                                                         | <b>5</b> × 1 eq hexane                              |
|----------------------------------------------|-------------------------------------------------------|------------------------------------------------------------------|-------------------------------------------------------|------------------------------------------------------------------|-----------------------------------------------------|
| Empirical formula                            | C <sub>68</sub> H <sub>80</sub> Cl <sub>2</sub> GePSn | C <sub>68</sub> H <sub>79</sub> Cl <sub>2</sub> PSn <sub>2</sub> | C <sub>54</sub> H <sub>75</sub> Cl <sub>2</sub> GePSn | C <sub>54</sub> H <sub>75</sub> Cl <sub>2</sub> PSn <sub>2</sub> | C <sub>60</sub> H <sub>75</sub> Cl <sub>2</sub> PSn |
| M <sub>r</sub> / g mol <sup>-1</sup>         | 1190.47                                               | 1235.56                                                          | 1017.29                                               | 1063.39                                                          | 1016.76                                             |
| λ / Å                                        | 0.71073                                               | 0.71073                                                          | 0.71073                                               | 0.71073                                                          | 0.71073                                             |
| T / K                                        | 100(2)                                                | 100(2)                                                           | 100(2)                                                | 100(2)                                                           | 100(2)                                              |
| Crystal system                               | orthorhombic                                          | orthorhombic                                                     | orthorhombic                                          | orthorhombic                                                     | orthorhombic                                        |
| Space group                                  | <i>Pna2</i> <sub>1</sub>                              | <i>Pna2</i> <sub>1</sub>                                         | <i>Pbca</i>                                           | <i>Pbca</i>                                                      | <i>Pbca</i>                                         |
| Z                                            | 4                                                     | 4                                                                | 8                                                     | 8                                                                | 8                                                   |
| a / Å                                        | 29.0011(11)                                           | 29.1761(10)                                                      | 16.0516(4)                                            | 16.0688(4)                                                       | 14.7617(3)                                          |
| b / Å                                        | 19.7482(7)                                            | 19.7911(7)                                                       | 24.7557(6)                                            | 24.6470(6)                                                       | 24.9093(5)                                          |
| c / Å                                        | 10.5468(4)                                            | 10.5653(3)                                                       | 25.9550(7)                                            | 26.0868(6)                                                       | 29.0690(6)                                          |
| α / °                                        | 90.00                                                 | 90.00                                                            | 90.00                                                 | 90.00                                                            | 90.00                                               |
| β / °                                        | 90.00                                                 | 90.00                                                            | 90.00                                                 | 90.00                                                            | 90.00                                               |
| γ / °                                        | 90.00                                                 | 90.00                                                            | 90.00                                                 | 90.00                                                            | 90.00                                               |
| V / Å <sup>3</sup>                           | 6040.4(4)                                             | 6100.7(3)                                                        | 10313.7(5)                                            | 10331.6(4)                                                       | 10688.8(4)                                          |
| D <sub>c</sub> / g cm <sup>-3</sup>          | 1.309                                                 | 1.345                                                            | 1.310                                                 | 1.367                                                            | 1.264                                               |
| μ / mm <sup>-1</sup>                         | 1.065                                                 | 0.972                                                            | 1.235                                                 | 1.135                                                            | 0.645                                               |
| F(000)                                       | 2476                                                  | 2544                                                             | 4240                                                  | 4384                                                             | 4272                                                |
| Crystal size / mm                            | 0.33 × 0.29 × 0.12                                    | 0.34 × 0.28 × 0.17                                               | 0.23 × 0.13 × 0.12                                    | 0.37 × 0.19 × 0.18                                               | 0.25 × 0.21 × 0.16                                  |
| θ range / °                                  | 2.06 - 28.33                                          | 2.19 - 28.30                                                     | 2.60 - 28.11                                          | 2.60 - 28.28                                                     | 2.56 - 28.26                                        |
| Limiting indices                             | -38 ≤ h ≤ 38<br>-25 ≤ k ≤ 26<br>-14 ≤ l ≤ 13          | -37 ≤ h ≤ 38<br>-26 ≤ k ≤ 23<br>-14 ≤ l ≤ 14                     | -19 ≤ h ≤ 19<br>-30 ≤ k ≤ 30<br>-32 ≤ l ≤ 32          | -19 ≤ h ≤ 20<br>-29 ≤ k ≤ 30<br>-32 ≤ l ≤ 32                     | -15 ≤ h ≤ 19<br>-33 ≤ k ≤ 33<br>-37 ≤ l ≤ 38        |
| Reflects. collect.                           | 82847                                                 | 64733                                                            | 74213                                                 | 158517                                                           | 91447                                               |
| Indepnt Reflects                             | 14658                                                 | 14893                                                            | 10523                                                 | 10546                                                            | 13265                                               |
| R <sub>int</sub>                             | 0.0286                                                | 0.0306                                                           | 0.0481                                                | 0.0396                                                           | 0.0326                                              |
| Completeness                                 | 99.8                                                  | 99.9                                                             | 99.8                                                  | 99.9                                                             | 1.00                                                |
| Absorp. Corr.                                | numerical                                             | numerical                                                        | numerical                                             | numerical                                                        | numerical                                           |
| Trans.(max., min.)                           | 0.88, 1.00                                            | 0.88, 1.00                                                       | 0.90, 1.00                                            | 0.80, 0.93                                                       | 0.94, 1.00                                          |
| Parameters/restraints                        | 693/1                                                 | 702/43                                                           | 544/0                                                 | 544(0)                                                           | 590/39                                              |
| R <sub>1</sub> , ωR <sub>2</sub> [I > 2σ(I)] | 0.0276, 0.0623                                        | 0.0257, 0.0485                                                   | 0.0308, 0.0606                                        | 0.0226, 0.0454                                                   | 0.0360, 0.0782                                      |
| R <sub>1</sub> , ωR <sub>2</sub> (all data)  | 0.0304, 0.0633                                        | 0.0294, 0.0494                                                   | 0.0496, 0.0663                                        | 0.0300, 0.0481                                                   | 0.0520, 0.0858                                      |
| Goof on F <sup>2</sup>                       | 1.072                                                 | 1.111                                                            | 1.042                                                 | 1.047                                                            | 1.033                                               |
| Δρ <sub>max,min</sub> / e·Å <sup>-3</sup>    | 0.986, -0.811                                         | 0.750, -0.528                                                    | 0.642, -0.395                                         | 0.608, -0.431                                                    | 1.431, -1.154                                       |
| Flack parameter                              | 0.011(6)                                              | -0.004(9)                                                        |                                                       |                                                                  |                                                     |
| CCDC                                         | 1457389                                               | 1457390                                                          | 1457387                                               | 1457388                                                          | 1457391                                             |

## 2 Additional NMR Data

### 2.1 $^{31}\text{P}$ - $^{31}\text{P}$ EXSY NMR spectrum for compound **4** (Tol-d8)

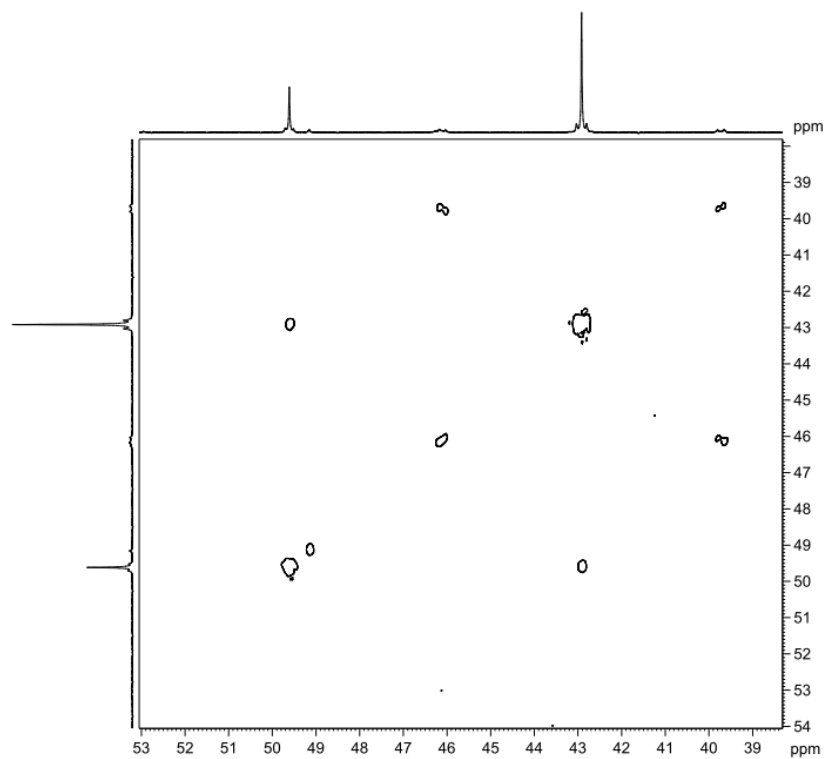

### 2.2 dT $^{31}\text{P}$ NMR spectra for compound **4** (Tol-d8)

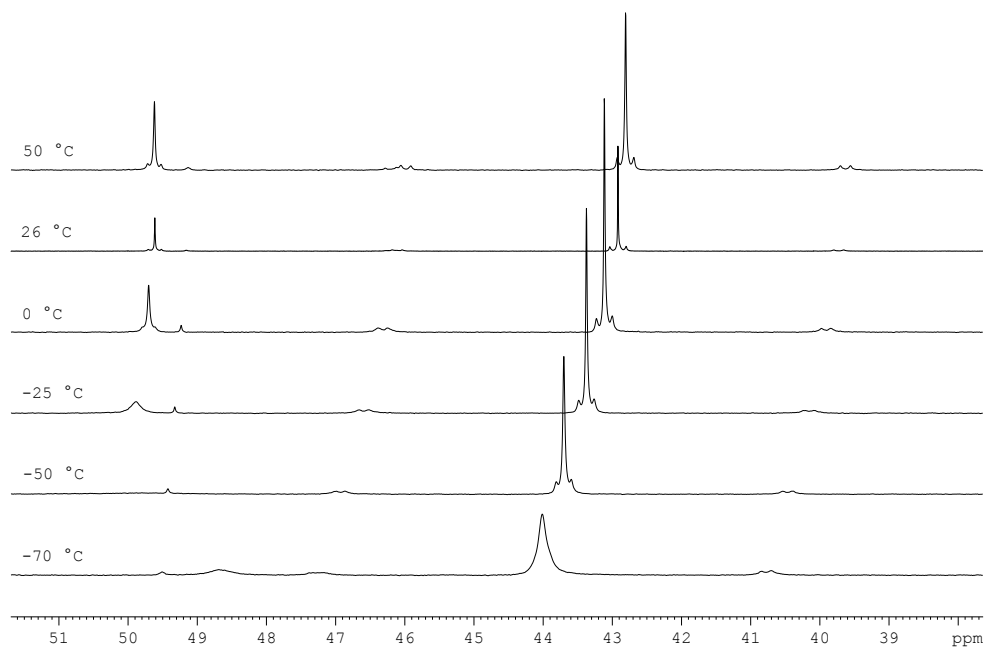

2.3  $^1\text{H}$ ,  $^{13}\text{C}$ ,  $^{119}\text{Sn}$  and  $^{31}\text{P}$  NMR spectra for compound **1** ( $\text{C}_6\text{D}_6$ )

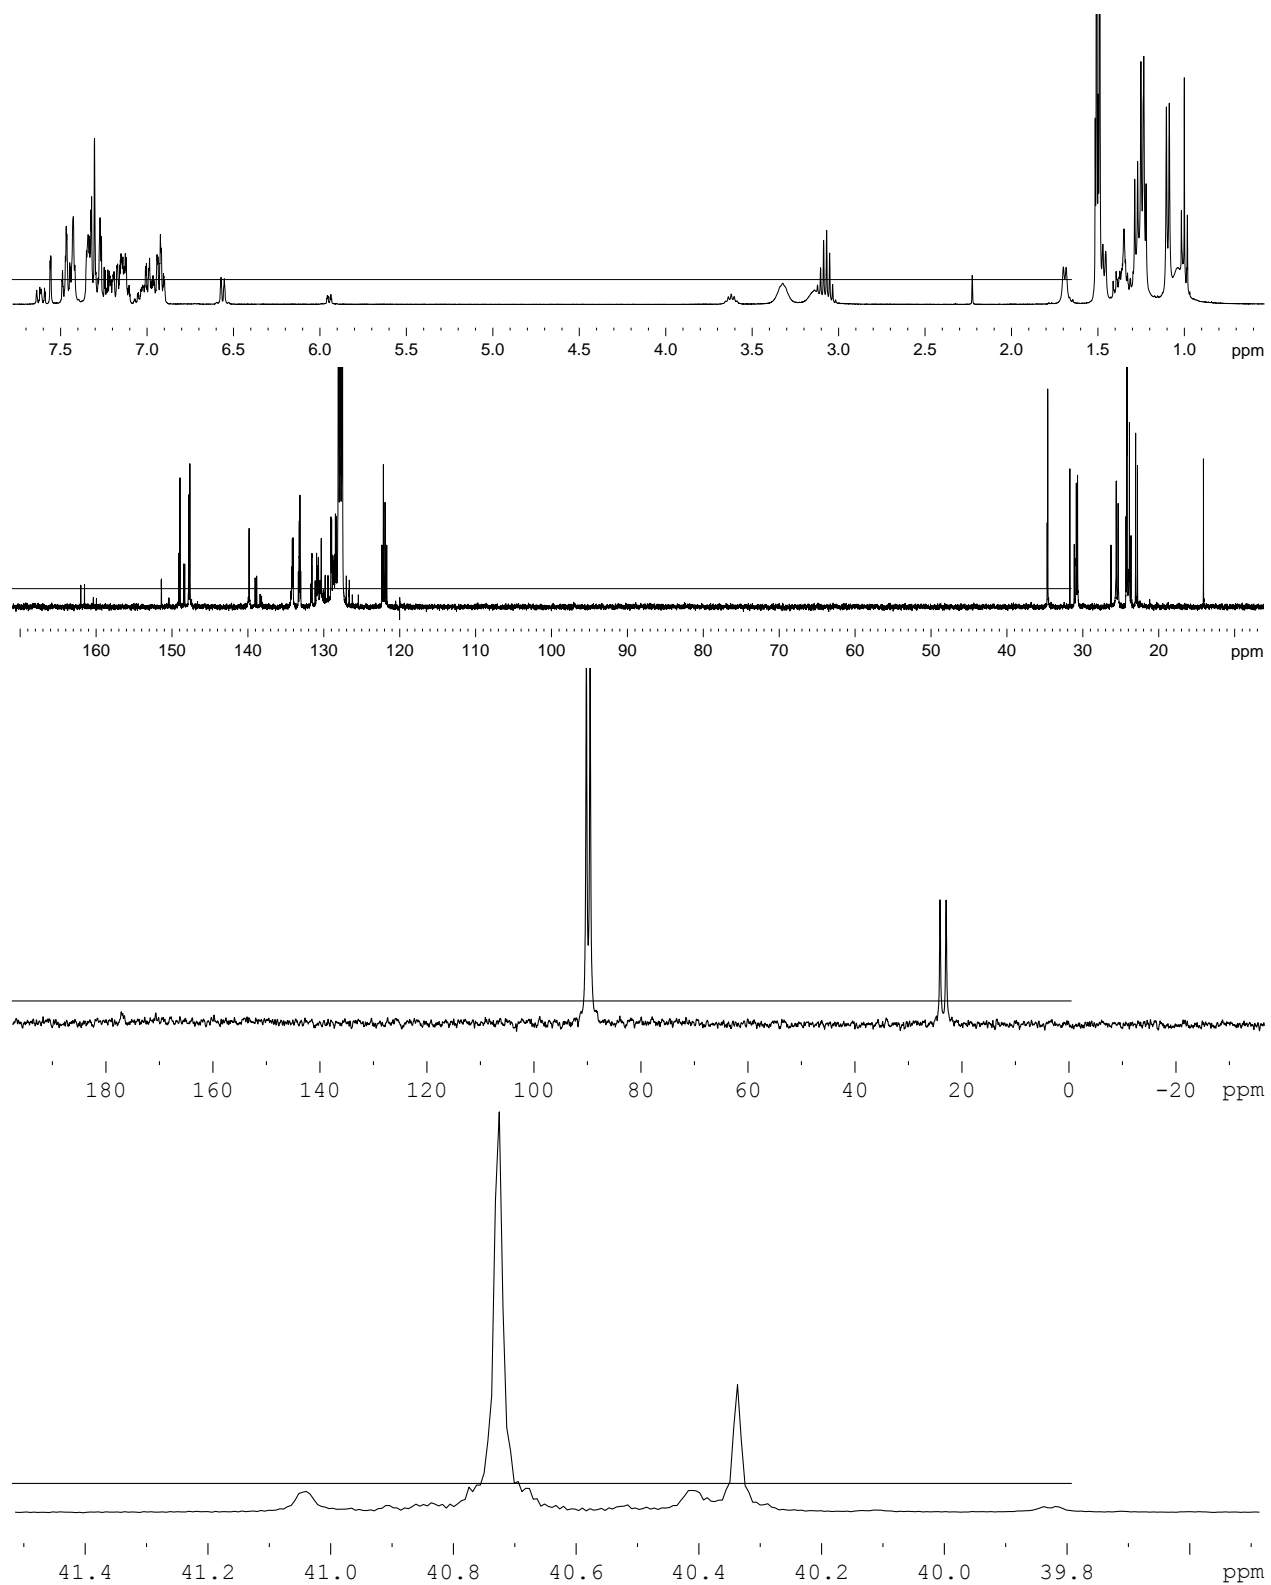

2.4  $^1\text{H}$ ,  $^{13}\text{C}$ ,  $^{119}\text{Sn}$  and  $^{31}\text{P}$  NMR spectra for compound **2** ( $\text{C}_6\text{D}_6$ )

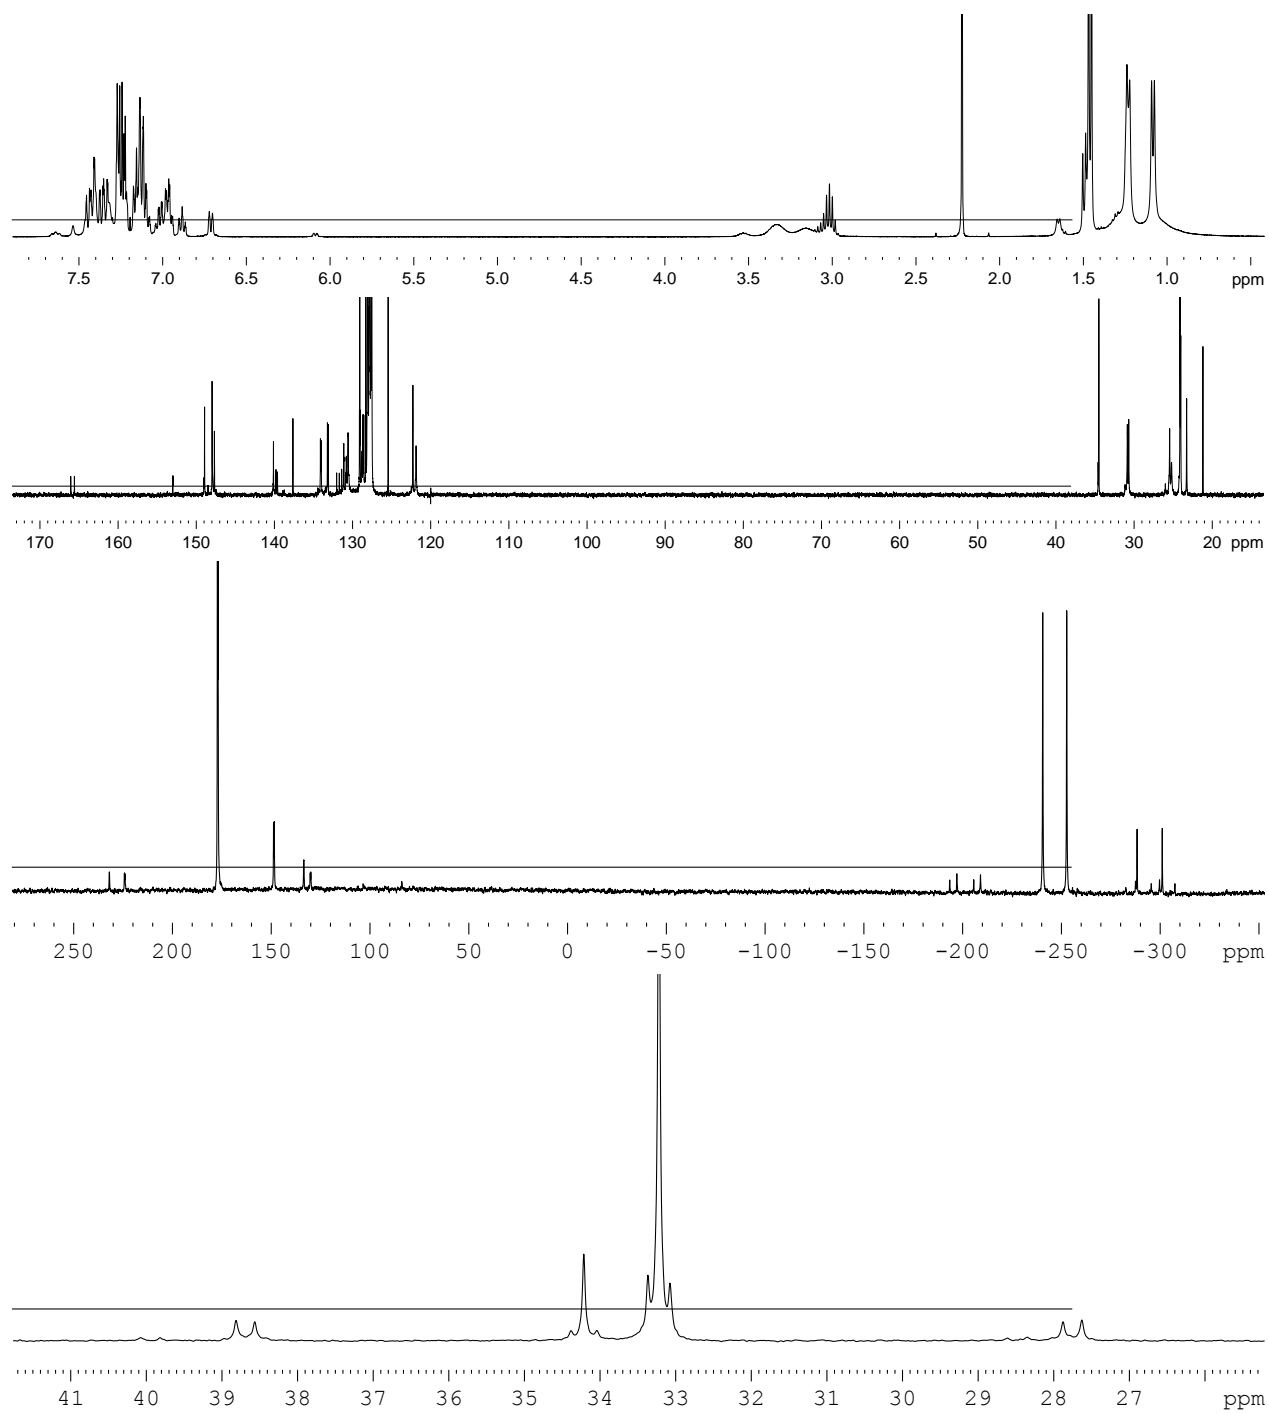

2.5  $^1\text{H}$ ,  $^{13}\text{C}$ ,  $^{119}\text{Sn}$  and  $^{31}\text{P}$  NMR spectra for compound **3** ( $\text{C}_6\text{D}_6$ )

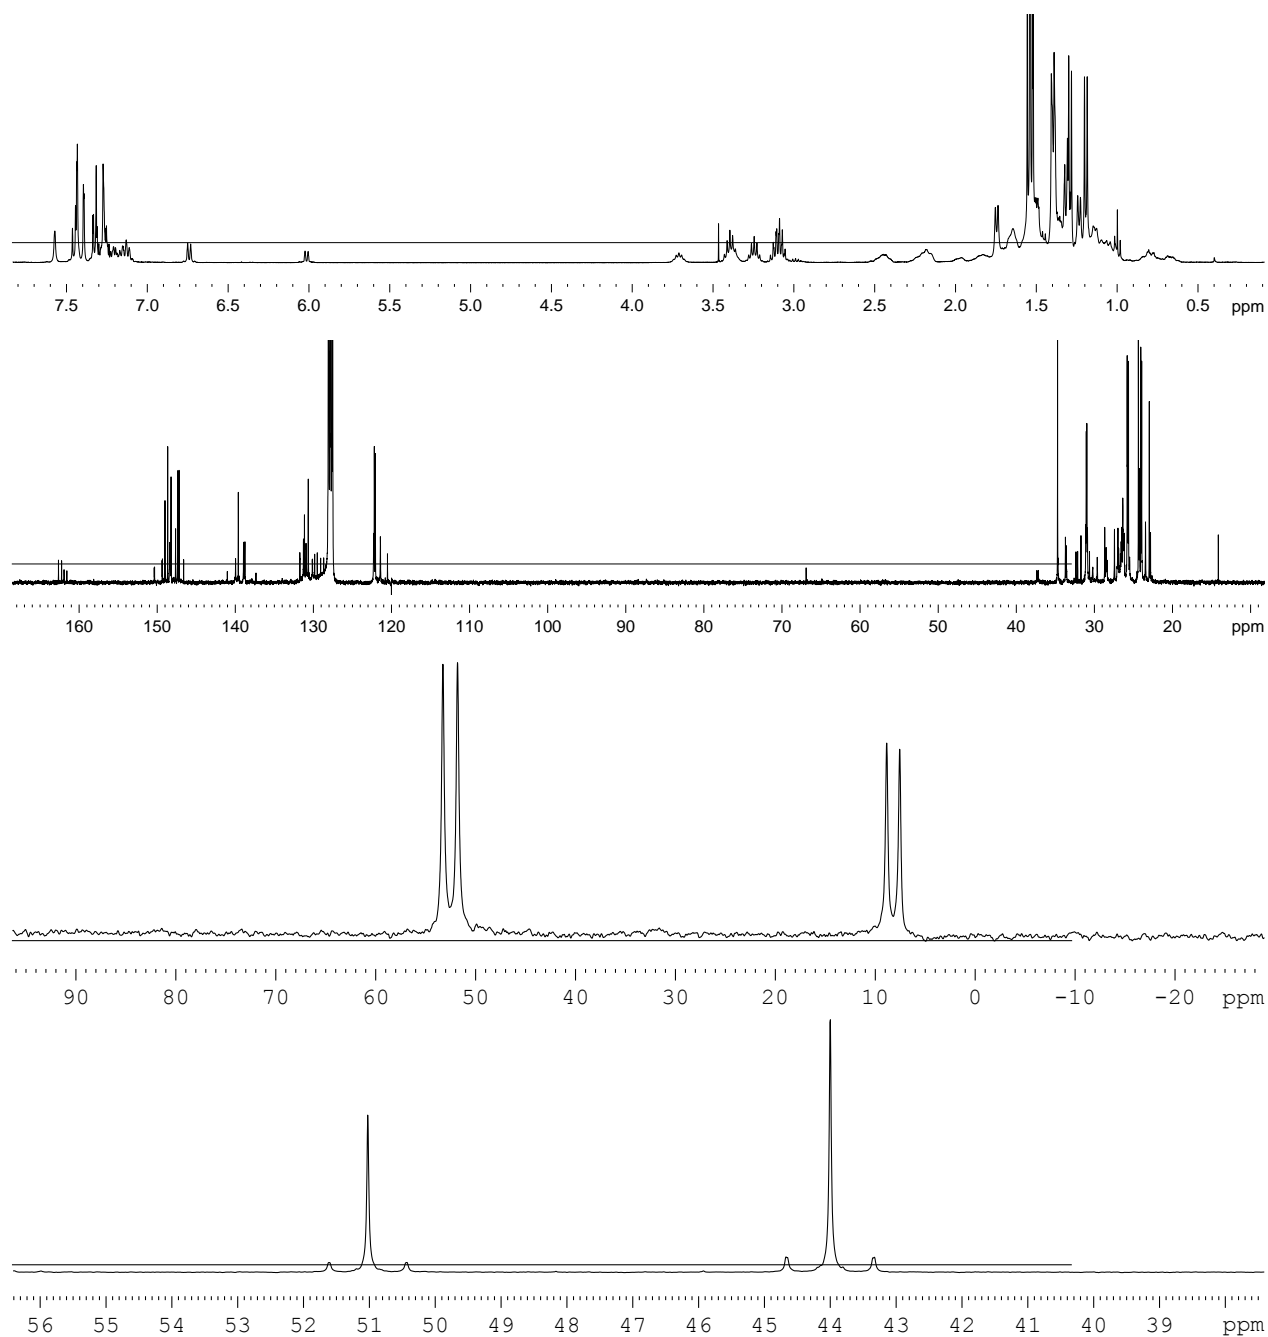

2.6  $^1\text{H}$ ,  $^{13}\text{C}$ ,  $^{119}\text{Sn}$  and  $^{31}\text{P}$  NMR spectra for compound **4** ( $\text{C}_6\text{D}_6$ )

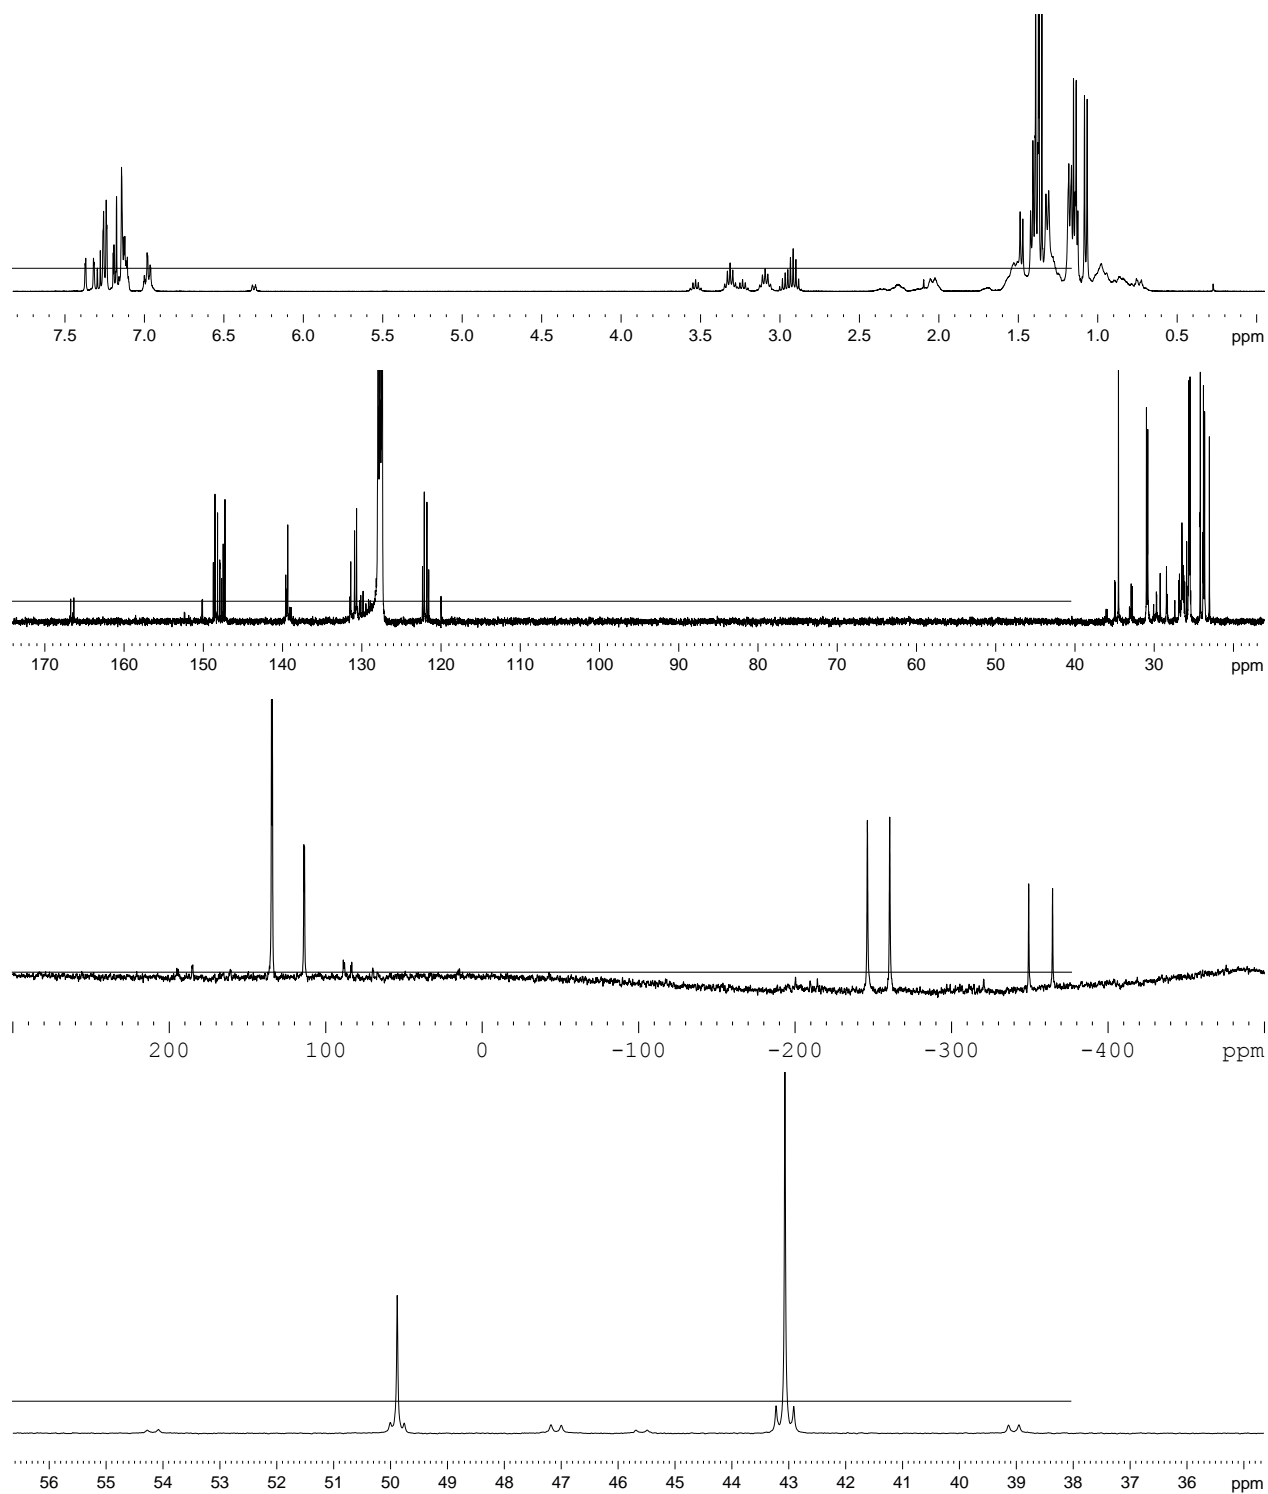



2.7  $^1\text{H}$ ,  $^{13}\text{C}$ ,  $^{119}\text{Sn}$  and  $^{31}\text{P}$  NMR spectra for compound **5** ( $\text{C}_6\text{D}_6$ )

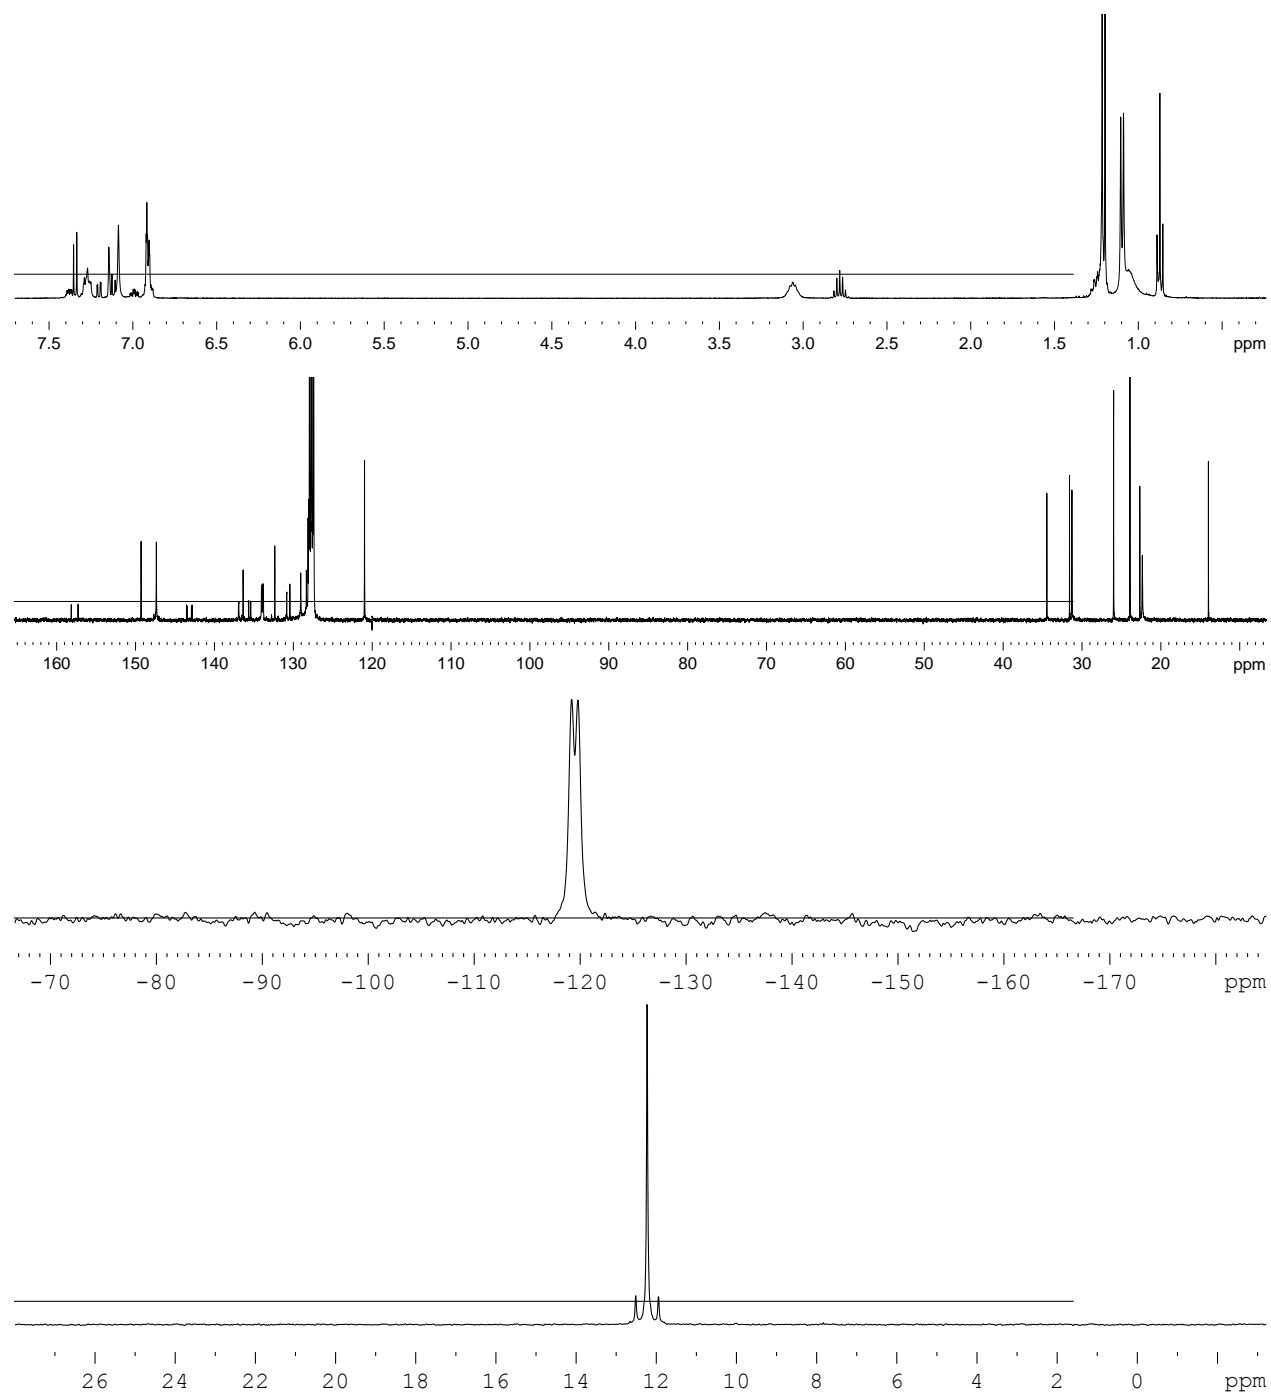

2.8 Exemplary determination of the coupling pattern in the  $^{119}\text{Sn}$  NMR spectra (compound **2**):

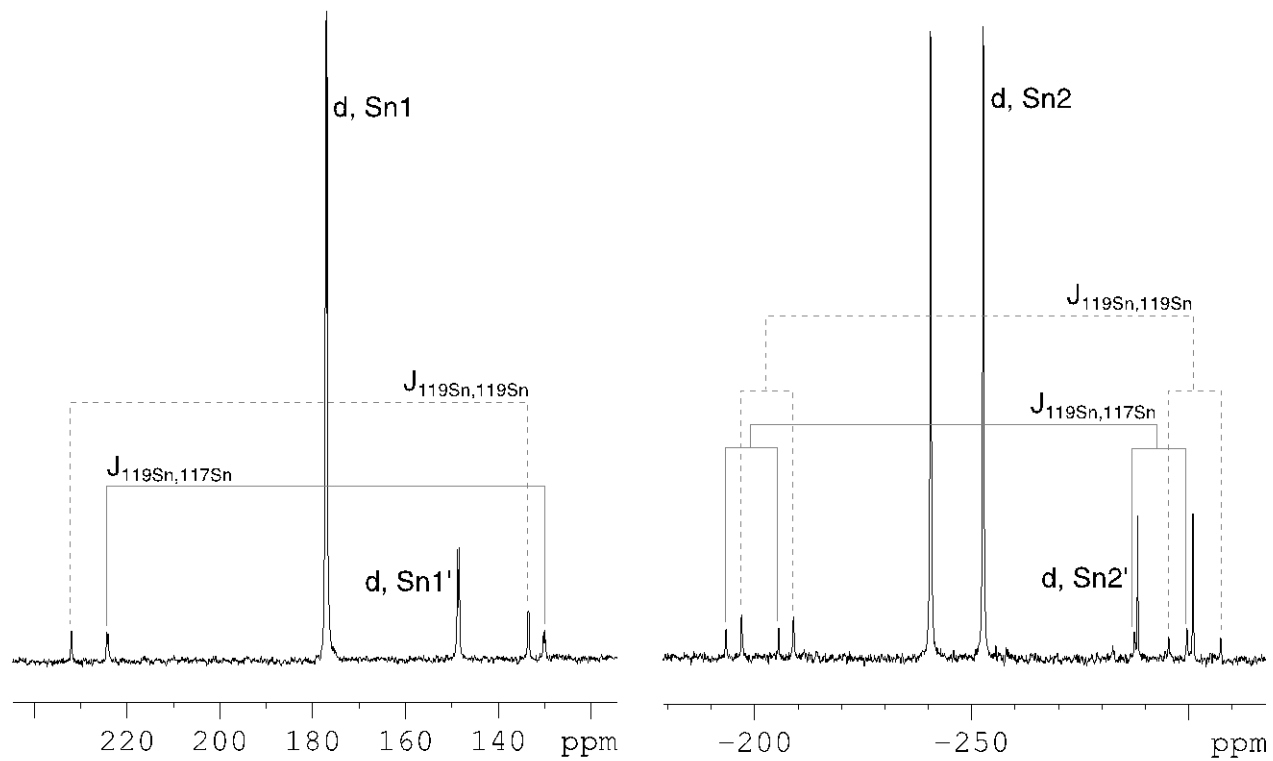

Supplement: c6dt00916f1.pdf [file c6dt00916f1.pdf]
